# Supplementary material for: Asymmetric Rh-catalyzed hydrogenation using a furanoside phosphite–phosphoroamidite and diphosphoroamidite ligand library
Source: Royal Society of Chemistry journal article supplement (doi:10.1039/c2dt11888b), 2012-01-01
Supplement: c2dt11888b.pdf [file c2dt11888b.pdf]

# Asymmetric Rh-catalyzed hydrogenation using a furanoside phosphite-phosphoroamidite and diphosphoroamidite ligand library

*Mercedes Coll, Oscar Pàmies\* and Montserrat Diéguez\**

## Contents

|                    |                                                                                                                                                                                                              |    |
|--------------------|--------------------------------------------------------------------------------------------------------------------------------------------------------------------------------------------------------------|----|
| <b>Table SI.1.</b> | Selected results for the asymmetric Rh-catalyzed hydrogenation of $\alpha$ -dehydroamino-acid esters <b>S2</b> and <b>S3</b> using phosphite-phosphoroamidite and diphosphoroamidite ligands <b>L1-L5a-f</b> | S2 |
| <b>Table SI.2.</b> | Asymmetric Rh-catalyzed hydrogenation of <i>N</i> -(1-(4-methoxyphenyl)vinyl)-acetamide <b>S4</b> using phosphite-phosphoroamidite and diphosphoroamidite ligands <b>L1-L5a-f</b>                            | S3 |

**Table SI.1.** Selected results for the asymmetric Rh-catalyzed hydrogenation of  $\alpha$ -dehydroamino-acid esters using phosphite-phosphoramidite and diphosphoramidite ligands **L1-L5a-f**<sup>a</sup>

| Entry             | Ligand     | S2                      |                  | S3                      |                  |
|-------------------|------------|-------------------------|------------------|-------------------------|------------------|
|                   |            | % Conv (h) <sup>b</sup> | %ee <sup>c</sup> | % Conv (h) <sup>b</sup> | %ee <sup>c</sup> |
| 1                 | <b>L1a</b> | 100 (6)                 | 92 ( <i>S</i> )  | 100 (6)                 | 94 ( <i>S</i> )  |
| 2                 | <b>L1b</b> | 100 (6)                 | 82 ( <i>S</i> )  | 100 (6)                 | 85 ( <i>S</i> )  |
| 3                 | <b>L1c</b> | 100 (6)                 | 12 ( <i>R</i> )  | 100 (6)                 | 18 ( <i>R</i> )  |
| 4                 | <b>L1d</b> | 100 (6)                 | 15 ( <i>S</i> )  | 100 (6)                 | 13 ( <i>S</i> )  |
| 5                 | <b>L1e</b> | 100 (6)                 | 86 ( <i>R</i> )  | 100 (6)                 | 83 ( <i>R</i> )  |
| 6                 | <b>L1f</b> | 100 (6)                 | 92 ( <i>S</i> )  | 100 (6)                 | 93 ( <i>S</i> )  |
| 7                 | <b>L2a</b> | 100 (6)                 | 15 ( <i>S</i> )  | 100 (6)                 | 18 ( <i>S</i> )  |
| 8                 | <b>L2b</b> | 93 (6)                  | 12 ( <i>S</i> )  | 95 (6)                  | 17 ( <i>S</i> )  |
| 9                 | <b>L2c</b> | 100 (6)                 | 4 ( <i>S</i> )   | 100 (6)                 | 8 ( <i>S</i> )   |
| 10                | <b>L2e</b> | 84 (6)                  | 14 ( <i>R</i> )  | 89 (6)                  | 17 ( <i>R</i> )  |
| 11                | <b>L2f</b> | 99 (6)                  | 21 ( <i>S</i> )  | 99 (6)                  | 22 ( <i>S</i> )  |
| 12                | <b>L3a</b> | 30 (6)                  | 4 ( <i>R</i> )   | 48 (6)                  | 6 ( <i>R</i> )   |
| 13                | <b>L3b</b> | 24 (6)                  | 10 ( <i>R</i> )  | 36 (6)                  | 11 ( <i>R</i> )  |
| 14                | <b>L3c</b> | 100 (6)                 | 85 ( <i>S</i> )  | 100 (6)                 | 78 ( <i>S</i> )  |
| 15                | <b>L4a</b> | 78 (6)                  | 14 ( <i>S</i> )  | 69 (6)                  | 13 ( <i>S</i> )  |
| 16                | <b>L4b</b> | 100 (6)                 | 13 ( <i>S</i> )  | 100 (6)                 | 16 ( <i>S</i> )  |
| 17                | <b>L4c</b> | 100 (6)                 | 78 ( <i>S</i> )  | 100 (6)                 | 71 ( <i>S</i> )  |
| 18                | <b>L5a</b> | 100 (6)                 | 43 ( <i>S</i> )  | 100 (6)                 | 44 ( <i>S</i> )  |
| 19 <sup>d</sup>   | <b>L1a</b> | 100 (12)                | 98 ( <i>S</i> )  | 100 (20)                | 98 ( <i>S</i> )  |
| 20 <sup>d,e</sup> | <b>L1a</b> | 96 (20)                 | 98 ( <i>S</i> )  | 65 (20)                 | 98 ( <i>S</i> )  |

<sup>a</sup> [Rh(cod)<sub>2</sub>]BF<sub>4</sub> (1 mol%), ligand (1.1 mol%), substrate (1 mmol), CH<sub>2</sub>Cl<sub>2</sub> (6 mL), 5 bar of H<sub>2</sub>, room temperature. <sup>b</sup> % Conversion measured by GC. <sup>c</sup> Enantiomeric excess measured by GC. <sup>d</sup> Reaction carried out at 5 °C. <sup>e</sup> Reaction carried out using 0.1 mol% catalyst.

**Table SI.2.** Asymmetric Rh-catalyzed hydrogenation of *N*-(1-(4-methoxyphenyl)vinyl)-acetamide **S4** using phosphite-phosphoroamidite and diphosphoroamidite ligands **L1-L5a-f**<sup>a</sup>

| Entry | Ligand     | % Conv (h) <sup>b</sup> | %ee <sup>c</sup> | Entry             | Ligand     | % Conv (h) <sup>b</sup> | %ee <sup>c</sup> |
|-------|------------|-------------------------|------------------|-------------------|------------|-------------------------|------------------|
| 1     | <b>L1a</b> | 100 (12)                | 73 ( <i>S</i> )  | 16                | <b>L3d</b> | 100 (12)                | 12 ( <i>R</i> )  |
| 2     | <b>L1b</b> | 100 (12)                | 65 ( <i>S</i> )  | 17                | <b>L4a</b> | 100 (12)                | 52 ( <i>S</i> )  |
| 3     | <b>L1c</b> | 99 (12)                 | 14 ( <i>R</i> )  | 18                | <b>L4b</b> | 100 (12)                | 50 ( <i>S</i> )  |
| 4     | <b>L1d</b> | 100 (12)                | 16 ( <i>S</i> )  | 19                | <b>L4c</b> | 98 (12)                 | 19 ( <i>S</i> )  |
| 5     | <b>L1e</b> | 100 (12)                | 46 ( <i>R</i> )  | 20                | <b>L4d</b> | 100 (12)                | 7 ( <i>R</i> )   |
| 6     | <b>L1f</b> | 100 (12)                | 70 ( <i>S</i> )  | 21                | <b>L5a</b> | 100 (12)                | 60 ( <i>S</i> )  |
| 7     | <b>L2a</b> | 100 (12)                | 18 ( <i>R</i> )  | 22                | <b>L5b</b> | 100 (12)                | 47 ( <i>S</i> )  |
| 8     | <b>L2b</b> | 100 (12)                | 13 ( <i>R</i> )  | 23                | <b>L5c</b> | 100 (12)                | 31 ( <i>S</i> )  |
| 9     | <b>L2c</b> | 97 (12)                 | 14 ( <i>S</i> )  | 24                | <b>L5e</b> | 100 (12)                | 36 ( <i>S</i> )  |
| 10    | <b>L2d</b> | 100 (12)                | 7 ( <i>R</i> )   | 25                | <b>L5f</b> | 100 (12)                | 66 ( <i>S</i> )  |
| 11    | <b>L2e</b> | 94 (12)                 | 17 ( <i>R</i> )  | 26 <sup>d</sup>   | <b>L1a</b> | 100 (12)                | 72 ( <i>S</i> )  |
| 12    | <b>L2f</b> | 99 (12)                 | 33 ( <i>S</i> )  | 27 <sup>e</sup>   | <b>L1a</b> | 42 (24)                 | 76 ( <i>S</i> )  |
| 13    | <b>L3a</b> | 100 (12)                | 54 ( <i>S</i> )  | 28 <sup>f</sup>   | <b>L1a</b> | 95 (18)                 | 76 ( <i>S</i> )  |
| 14    | <b>L3b</b> | 100 (12)                | 49 ( <i>S</i> )  | 29 <sup>g</sup>   | <b>L1a</b> | 100 (24)                | 86 ( <i>S</i> )  |
| 15    | <b>L3c</b> | 98 (12)                 | 6 ( <i>S</i> )   | 30 <sup>f,g</sup> | <b>L1a</b> | 71 (36)                 | 88 ( <i>S</i> )  |

<sup>a</sup> [Rh(cod)<sub>2</sub>]BF<sub>4</sub> (1 mol%), ligand (1.1 mol%), substrate (0.25 mmol), CH<sub>2</sub>Cl<sub>2</sub> (2 mL), room temperature, 30 bar of H<sub>2</sub>. <sup>b</sup> % Conversion measured by GC. <sup>c</sup> Enantiomeric excess measured by GC. <sup>d</sup> Reaction carried out at a ligand/Rh ratio of 2. <sup>e</sup> Reaction carried out using 2.5 bar of H<sub>2</sub>. <sup>f</sup> Reaction carried out using 5 bar of H<sub>2</sub>. <sup>g</sup> Reaction carried out at 5 °C.
